# Supplementary material
Source: Elsevier journal article supplement (https://www.sciencedirect.com/science/article/pii/S2173574315001288)

**Tabla 1.** Aspectos generales sobre el ejercicio: práctica clínica habitual. Variables continuas.

|                                                                                                                                   | N  | Media (DE)  | Mediana (RIQ) |
|-----------------------------------------------------------------------------------------------------------------------------------|----|-------------|---------------|
| <b>Recomendaciones de los reumatólogos sobre el ejercicio</b>                                                                     |    |             |               |
| • Pacientes que necesitan, o en los que puede ser útil, realizar ejercicio (%)                                                    | 44 | 86,1 (19,3) | 92 (80-100)   |
| • .... a los que recomienda la práctica de ejercicio (%)                                                                          | 43 | 82,2 (17,7) | 80 (75-100)   |
| • ....en los que valora su forma física a la hora de recomendar ejercicio (%)                                                     | 43 | 69,5 (30,7) | 80 (40-100)   |
| • ...a los que contraindica la práctica de ejercicio (%)                                                                          | 43 | 5,6 (6,5)   | 5 (1-10)      |
| <b>Derivación a especialistas para prescripción de ejercicio</b>                                                                  |    |             |               |
| • Porcentaje de pacientes derivados a rehabilitación                                                                              | 44 | 23,4 (21,6) | 20 (10-30)    |
| • ..... derivados a fisioterapia                                                                                                  | 43 | 17,1 (17,3) | 15 (0-25)     |
| • ..... derivados a especialistas en actividad física y deporte                                                                   | 43 | 8,5 (14,0)  | 0 (0-10)      |
| • ..... derivados a gimnasios convencionales                                                                                      | 41 | 32,6 (23,7) | 30 (10-40)    |
| • ..... no derivados específicamente a ningún profesional                                                                         | 42 | 30,3 (26,3) | 30 (10-50)    |
| <b>Grado de accesibilidad a distintos especialistas (0-10)</b>                                                                    |    |             |               |
| • Rehabilitación                                                                                                                  | 44 | 7,5 (1,9)   | 7,5 (6-9)     |
| • Fisioterapia                                                                                                                    | 44 | 4,1 (3,1)   | 4 (1-6)       |
| • Especialistas en actividad física y deporte                                                                                     | 44 | 1,5 (2,1)   | 1 (0-2)       |
| <b>Utilidad de diferentes formatos para la recomendación de la práctica de ejercicio (0=ninguna utilidad, 10=máxima utilidad)</b> |    |             |               |
| • Folletos educativos                                                                                                             | 44 | 6,9 (1,9)   | 7 (6-8)       |
| • Páginas web                                                                                                                     | 44 | 6,3 (2,0)   | 6 (5-8)       |
| • Vídeos                                                                                                                          | 44 | 6,6 (2,2)   | 7 (5-8)       |
| • Demostración por el servicio de rehabilitación del hospital                                                                     | 44 | 7,1 (2,7)   | 8 (6-9)       |
| • Demostración por Ud mismo                                                                                                       | 44 | 6,0 (2,6)   | 6 (5-8)       |

**Tabla 2.** Aspectos generales sobre el ejercicio: práctica clínica habitual. Variables categóricas.

|                                                                                      | N (%)      |
|--------------------------------------------------------------------------------------|------------|
| <b>Capacitación para la recomendación de la práctica de ejercicio</b>                |            |
| Como reumatólogo puedo recomendar un programa de ejercicio a mis pacientes           |            |
| • No                                                                                 | 3 (6,8%)   |
| • Sí                                                                                 | 41 (93,2%) |
| Como reumatólogo poseo cualificación para recomendar ejercicios concretos            |            |
| • No                                                                                 | 14 (31,2%) |
| • Sí                                                                                 | 30 (68,2%) |
| Dedico una parte específica de la consulta a aspectos relacionados con el ejercicio  |            |
| • No                                                                                 | 16 (37,2%) |
| • Sí                                                                                 | 26 (62,8%) |
| <b>Disponibilidad en la consulta de material educativo sobre la actividad física</b> |            |
| Folletos informativos                                                                |            |
| • No                                                                                 | 4 (9,1%)   |
| • Sí                                                                                 | 40 (90,9%) |
| Videos                                                                               |            |
| • No                                                                                 | 33 (76,7%) |
| • Sí                                                                                 | 10 (23,3%) |
| Páginas web                                                                          |            |
| • No                                                                                 | 21 (47,7%) |
| • Sí                                                                                 | 23 (52,3%) |

**Tabla 3.** Conocimientos genéricos sobre el ejercicio: Variables continuas (I).

|                                                                             | N  | Media (DE) | Mediana (RIQ) |
|-----------------------------------------------------------------------------|----|------------|---------------|
| <b>Importancia recomendación de ejercicio en enf reumáticos.....(0-10)</b>  |    |            |               |
| • Edad                                                                      | 42 | 7,7 (1,9)  | 8 (7-9)       |
| • Sexo                                                                      | 42 | 3,1 (3,0)  | 2 (1-6)       |
| • Tipo patología (inflamatoria/mecánica)                                    | 41 | 7,8 (1,8)  | 8 (7-9)       |
| • Fase evolutiva o estadio de la patología                                  | 42 | 8,7 (1,4)  | 9 (8-10)      |
| • Forma física del paciente                                                 | 42 | 7,8 (1,3)  | 8 (7-9)       |
| • Distribución corporal                                                     | 40 | 6,1 (1,7)  | 6 (5-7)       |
| • Articulaciones afectadas                                                  | 42 | 8,5 (1,2)  | 9 (8-10)      |
| • Índice de masa corporal                                                   | 42 | 6,7 (1,7)  | 7 (5-8)       |
| • Experiencia previa del paciente con el ejercicio                          | 42 | 7,5 (1,8)  | 8 (7-9)       |
| • Preferencias del paciente sobre el tipo de ejercicio                      | 42 | 8,3 (1,2)  | 8 (8-9)       |
| • Accesibilidad                                                             | 42 | 8,3 (1,5)  | 9 (7-9)       |
| <b>Artrosis: importancia terapéutica del ejercicio....(0-10)</b>            |    |            |               |
| • Aeróbico                                                                  | 42 | 3,8 (2,7)  | 4 (2-6)       |
| • Estiramiento                                                              | 42 | 5,6 (2,5)  | 6 (4-7)       |
| • Fortalecimiento                                                           | 42 | 8,7 (1,0)  | 9 (8-10)      |
| • Activo-asistido                                                           | 42 | 6,1 (2,0)  | 6 (5-8)       |
| <b>Fibromialgia: importancia terapéutica del ejercicio....(0-10)</b>        |    |            |               |
| • Aeróbico                                                                  | 42 | 7,3 (2,6)  | 8 (6-9)       |
| • Estiramiento                                                              | 42 | 7,4 (2,4)  | 8 (6-9)       |
| • Fortalecimiento                                                           | 42 | 5,9 (2,4)  | 6 (5-8)       |
| • Activo-asistido                                                           | 42 | 4,6 (3,1)  | 5 (2-7)       |
| <b>Artritis reumatoide: importancia terapéutica del ejercicio....(0-10)</b> |    |            |               |
| • Aeróbico                                                                  | 42 | 5,6 (2,1)  | 5 (5-8)       |
| • Estiramiento                                                              | 42 | 5,8 (1,9)  | 6 (5-7)       |
| • Fortalecimiento                                                           | 42 | 6,8 (1,6)  | 7 (6-8)       |
| • Activo-asistido                                                           | 42 | 7,0 (1,8)  | 7 (6-8)       |
| <b>Espondiloartritis: importancia terapéutica del ejercicio....(0-10)</b>   |    |            |               |
| • Aeróbico                                                                  | 42 | 6,8 (2,2)  | 7 (6-8)       |
| • Estiramiento                                                              | 42 | 8,7 (1,0)  | 9 (8-9)       |
| • Fortalecimiento                                                           | 42 | 6,9 (1,5)  | 7 (6-8)       |
| • Activo-asistido                                                           | 42 | 6,0 (2,3)  | 6 (5-8)       |
| <b>Osteoporosis: importancia terapéutica del ejercicio....(0-10)</b>        |    |            |               |
| • Aeróbico                                                                  | 42 | 7,3 (2,3)  | 8 (5-9)       |
| • Estiramiento                                                              | 42 | 4,7 (2,4)  | 4 (3-6)       |
| • Fortalecimiento                                                           | 42 | 6,3 (1,9)  | 7 (5-8)       |
| • Activo-asistido                                                           | 42 | 4,7 (2,6)  | 4 (3-7)       |
| <b>Parte blanda: importancia terapéutica del ejercicio....(0-10)</b>        |    |            |               |
| • Aeróbico                                                                  | 42 | 5,0 (2,4)  | 5 (4-6)       |
| • Estiramiento                                                              | 42 | 7,4 (1,8)  | 8 (6-9)       |
| • Fortalecimiento                                                           | 42 | 7,8 (1,7)  | 8 (7-9)       |
| • Activo-asistido                                                           | 42 | 6,9 (2,1)  | 7 (5-9)       |
| <b>Artrosis de rodilla: efecto beneficioso (0-10) sobre:</b>                |    |            |               |
| • Dolor                                                                     | 41 | 6,2 (1,6)  | 6 (5-8)       |
| • Limitación funcional                                                      | 41 | 7,8 (1,2)  | 8 (7-9)       |
| • Implicación en el autocuidado                                             | 41 | 8,1 (1,5)  | 8 (7-9)       |
| • Calidad de vida                                                           | 41 | 8,0 (1,5)  | 8 (7-9)       |
| <b>Fibromialgia: efecto beneficioso (0-10) sobre:</b>                       |    |            |               |
| • Dolor                                                                     | 42 | 6,2 (2,5)  | 6 (5-8)       |

|                                                              |    |           |         |
|--------------------------------------------------------------|----|-----------|---------|
| • Fatiga                                                     | 42 | 6,0 (2,6) | 6 (5-8) |
| • Sueño                                                      | 42 | 6,8 (2,3) | 7 (5-8) |
| • Implicación en el autocuidado                              | 42 | 7,8 (2,1) | 8 (7-9) |
| • Calidad de vida                                            | 42 | 6,9 (2,5) | 7 (5-9) |
| <b>Artritis reumatoide: efecto beneficioso (0-10) sobre:</b> |    |           |         |
| • Dolor                                                      | 42 | 5,1 (1,8) | 5 (4-6) |
| • Limitación funcional                                       | 42 | 7,1 (1,7) | 7 (6-8) |
| • Fuerza                                                     | 42 | 7,0 (1,8) | 7 (6-8) |
| • Forma física                                               | 42 | 7,7 (1,2) | 7 (7-9) |
| • Calidad de vida                                            | 42 | 7,5 (1,6) | 7 (6-9) |

**Tabla 4.** Conocimientos genéricos sobre el ejercicio: Variables continuas (II).

|                                                                                                                                     | N  | Media (DE) | Mediana (RIQ) |
|-------------------------------------------------------------------------------------------------------------------------------------|----|------------|---------------|
| <b>Actitud, respecto al ejercicio, en brote inflamatorio de una enfermedad reumática (0=nada de acuerdo; 10=totalmente acuerdo)</b> |    |            |               |
| • Guardar reposo absoluto                                                                                                           | 42 | 3,0 (3,1)  | 2 (0-6)       |
| • Mantener el ejercicio al mismo ritmo                                                                                              | 41 | 0,8 (0,9)  | 1 (0-2)       |
| • Disminuir la frecuencia                                                                                                           | 42 | 6,8 (2,7)  | 7 (6-9)       |
| • Disminuir la intensidad                                                                                                           | 42 | 8,1 (2,1)  | 9 (8-9)       |
| • Cambiar la modalidad de ejercicio                                                                                                 | 41 | 6,8 (2,6)  | 7 (5-9)       |
| <b>Importancia de los siguientes factores para mejorar la adherencia al ejercicio (0=nada importante; 10=muy importante)</b>        |    |            |               |
| • Supervisión por especialistas en ejercicio                                                                                        | 42 | 7,8 (1,6)  | 8 (7-9)       |
| • Información sobre los objetivos y beneficios                                                                                      | 42 | 8,5 (1,3)  | 9 (8-7)       |
| • Tipo de instrucción                                                                                                               | 42 | 7,9 (1,4)  | 8 (7-9)       |
| • Tipo de ejercicio                                                                                                                 | 42 | 7,8 (1,5)  | 8 (7-9)       |
| • Frecuencia y duración del ejercicio                                                                                               | 42 | 7,7 (1,2)  | 8 (7-9)       |
| • Características del paciente                                                                                                      | 42 | 8,3 (1,6)  | 9 (8-9)       |
| • Profesional que lo prescribe                                                                                                      | 42 | 7,0 (2,0)  | 7 (6-9)       |
| • Accesibilidad                                                                                                                     | 42 | 8,7 (1,3)  | 9 (8-9)       |
| • Formato (videos, folletos, web, presencial....)                                                                                   | 42 | 7,4 (1,7)  | 8 (6-9)       |

**Tabla 5.** Conocimientos genéricos sobre el ejercicio: Variables categóricas.

|                                                                                                             | N (%)      |
|-------------------------------------------------------------------------------------------------------------|------------|
| <b>Los términos “actividad física, ejercicio físico y deporte” son sinónimos</b>                            | 41         |
| • No                                                                                                        | 39 (95,1%) |
| • Sí                                                                                                        | 2 (4,9%)   |
| <b>El término dosis sólo es aplicable a fármacos y no al ejercicio</b>                                      | 40         |
| • No                                                                                                        | 25 (62,5%) |
| • Sí                                                                                                        | 15 (37,5%) |
| <b>¿En qué tipo de patología reumática se obtienen mayores beneficios del ejercicio?</b>                    | 42         |
| • Inflamatoria periférica                                                                                   | -          |
| • Inflamatoria axial                                                                                        | 29 (69,0%) |
| • Artrosis de cadera                                                                                        | 1 (2,4%)   |
| • Artrosis de rodilla                                                                                       | 6 (14,3%)  |
| • Osteoporosis                                                                                              | -          |
| • Reumatismos de partes blandas                                                                             | 6 (14,3%)  |
| <b>¿Cuáles son los efectos de los ejercicios de estiramiento?</b>                                           | 40         |
| • Estirar el músculo y aumentar su longitud                                                                 | 15 (37,5%) |
| • Mejorar la movilidad articular                                                                            | 17 (42,5%) |
| • Aumentar la potencia muscular                                                                             | 1 (2,5%)   |
| • Mejorar la resistencia                                                                                    | 7 (17,5%)  |
| <b>¿Cuáles son los efectos de los ejercicios de fortalecimiento?</b>                                        | 42         |
| • Mejorar la fuerza                                                                                         | -          |
| • Mejorar la resistencia                                                                                    | 1 (2,4%)   |
| • Aumentar la potencia muscular                                                                             | 6 (14,3%)  |
| • Todos los anteriores                                                                                      | 35 (83,3%) |
| <b>En las enfermedades reumáticas el ejercicio debe ser básico y estandarizado para todos los pacientes</b> | 41         |
| • No                                                                                                        | 38 (92,7%) |
| • Sí                                                                                                        | 3 (7,3%)   |
| <b>En las enfermedades reumáticas el ejercicio debe ser específico para distintos grupos de pacientes</b>   | 41         |
| • No                                                                                                        |            |
| • Sí                                                                                                        | 41 (100%)  |
| <b>En las enfermedades reumáticas el ejercicio debe ser prescrito únicamente por especialistas</b>          | 40         |
| • No                                                                                                        | 20 (50%)   |
| • Sí                                                                                                        | 20 (50%)   |

**Tabla 6.** Ejercicio en espondiloartritis: variables categóricas.

|                                                                              | N (%)      |
|------------------------------------------------------------------------------|------------|
| <b>El ejercicio puede ser un factor desencadenante de brotes</b>             | 41         |
| • No                                                                         | 27 (65,8%) |
| • Sí                                                                         | 14 (34,1%) |
| <b>¿En qué fase de la enfermedad debe utilizarse el ejercicio?</b>           | 41         |
| • Inicial                                                                    | -          |
| • Intermedia/Avanzada                                                        | -          |
| • Tardía                                                                     | -          |
| • Todas las anteriores                                                       | 41 (100%)  |
| <b>¿La práctica de ejercicio puede retrasar el inicio de un tratamiento?</b> | 41         |
| • No                                                                         | 20 (48,8%) |
| • Sí                                                                         | 21 (51,2%) |

**Figura 1.** Capacitación de los reumatólogos para la recomendación de ejercicio.

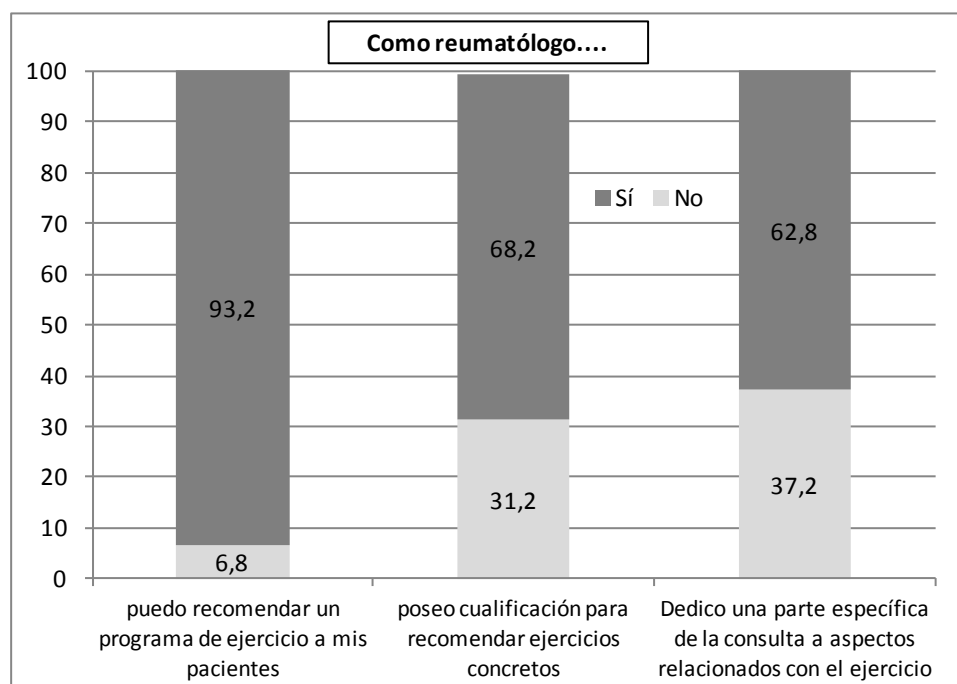

**Figura 2.** Disponibilidad en la consulta de material educativo sobre la actividad física.

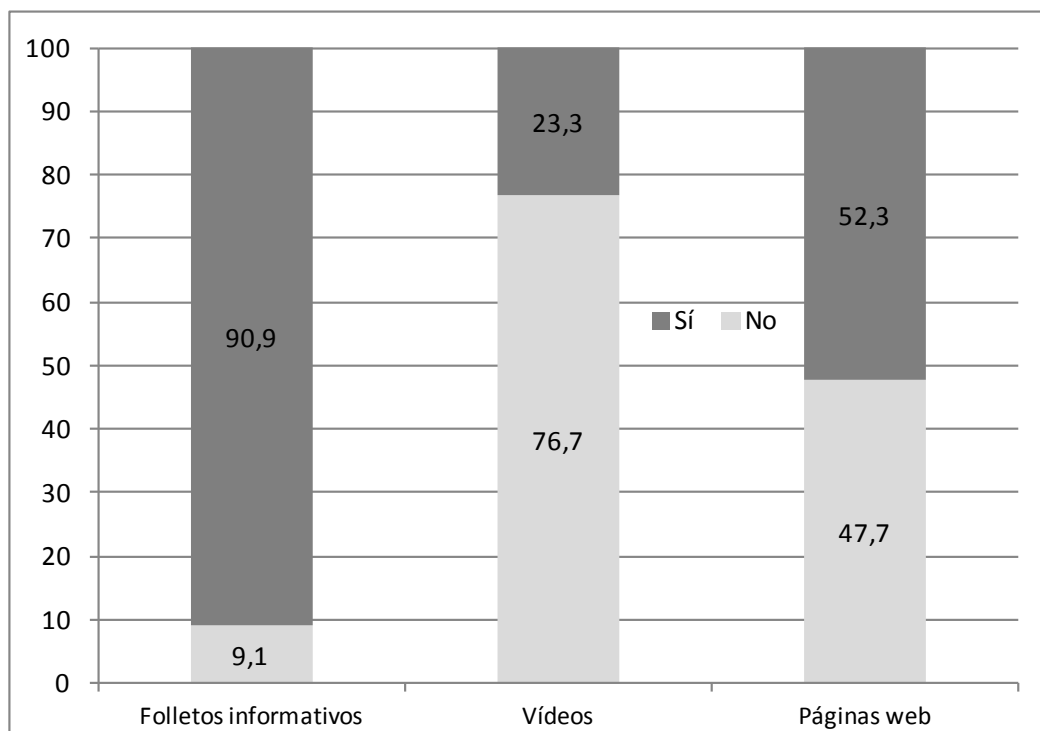

**Figura 3.** Utilidad de diferentes formatos para recomendar la práctica de ejercicio.

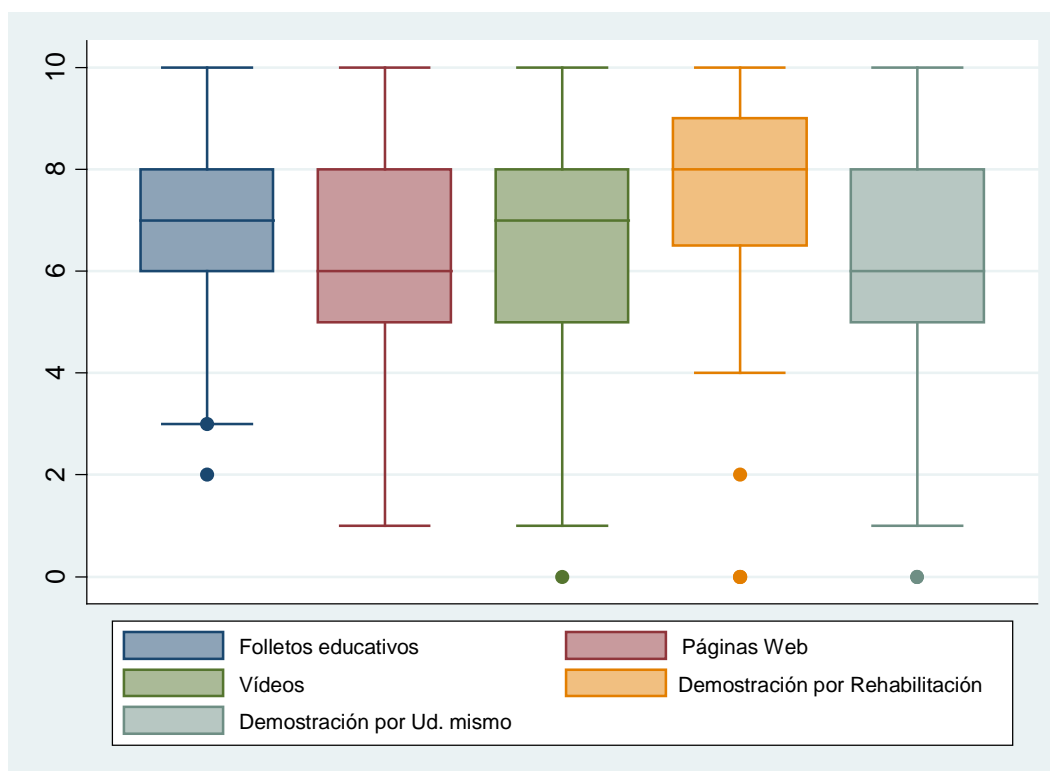

**Figura 4.** Conocimiento genérico sobre el ejercicio.

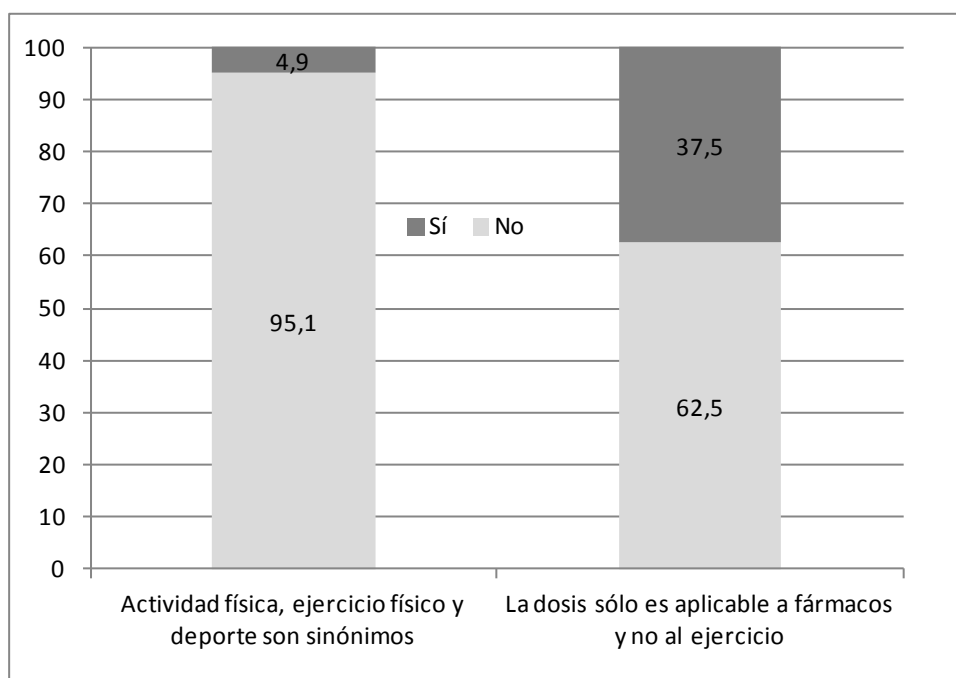

**Figura 5.** Importancia de distintos factores para la recomendación de la práctica de ejercicio a pacientes reumáticos (0=nada importante; 10=muy importante).

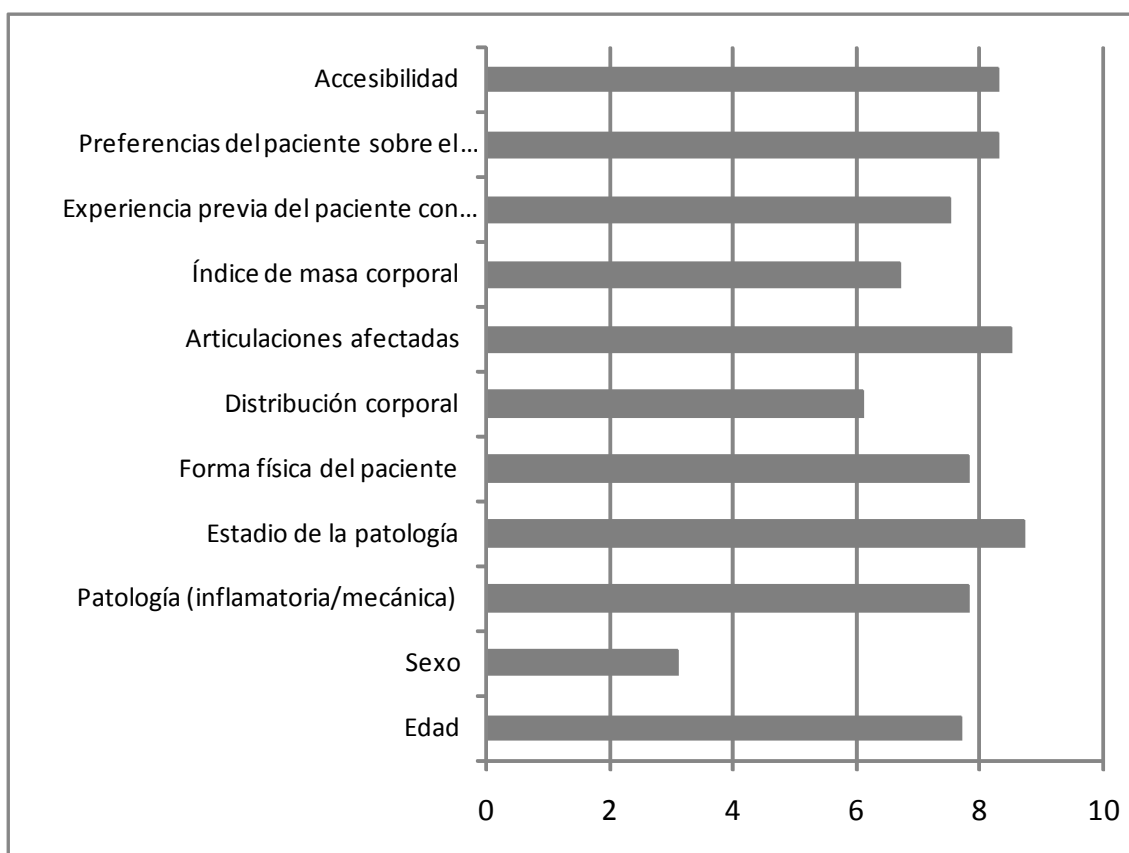

**Figura 6.** ¿En qué tipo de patología reumática se obtienen mayores beneficios del ejercicio?.

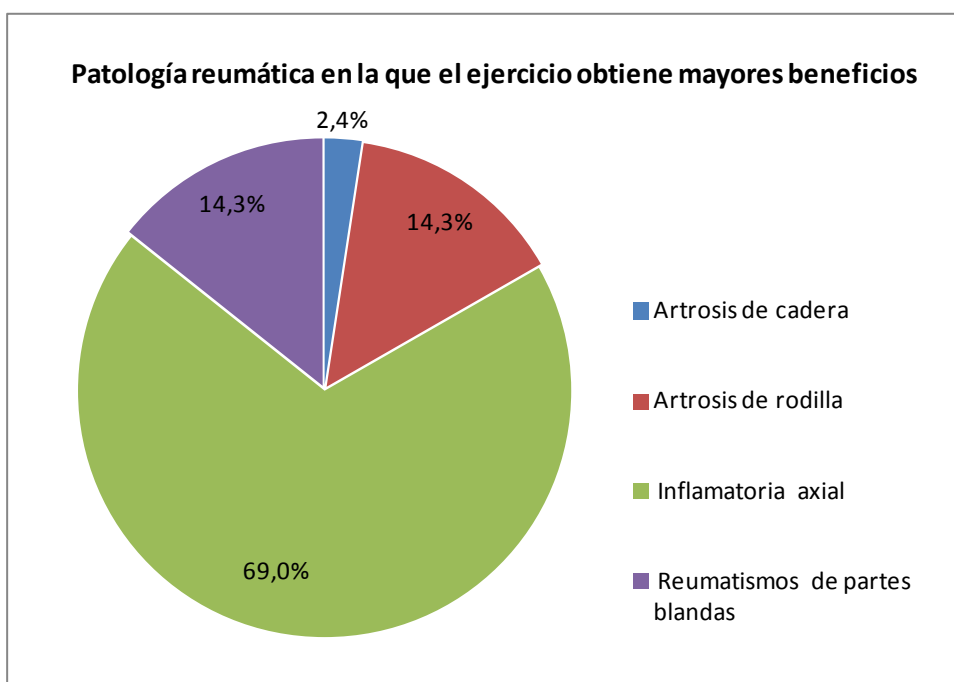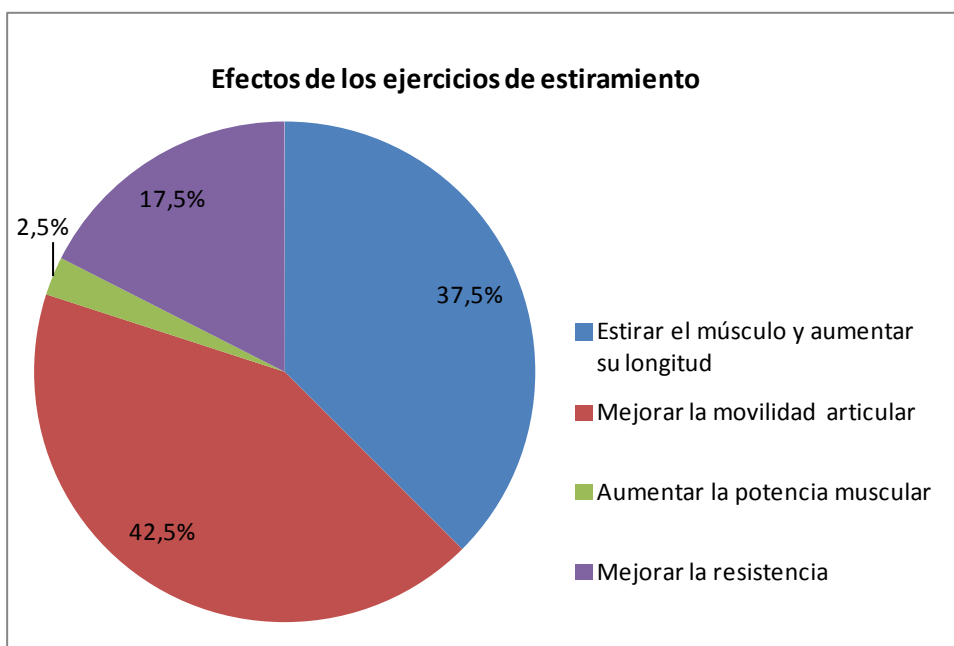



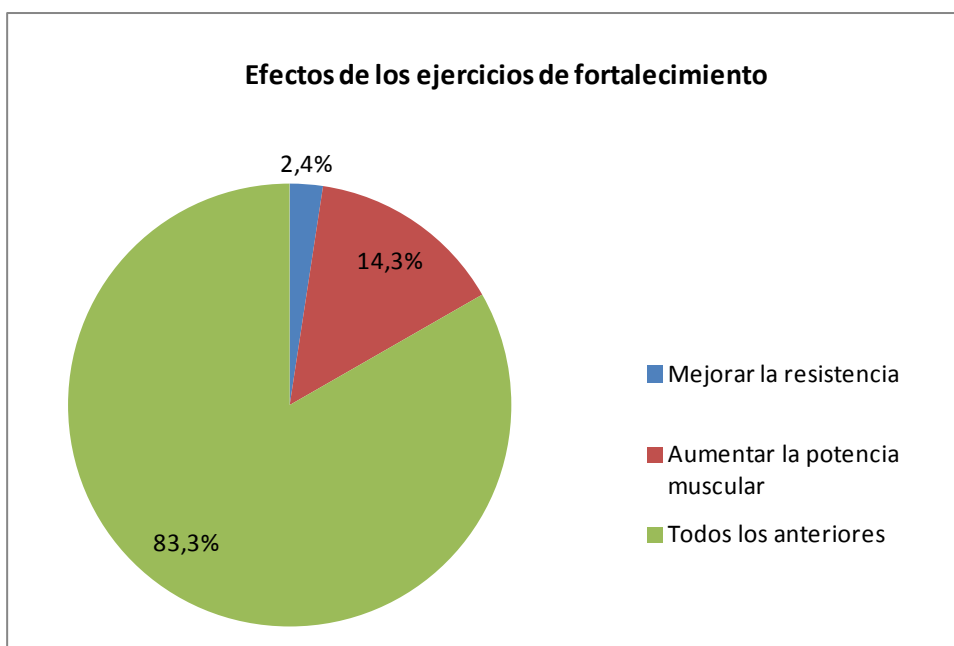

**Figura 7.** Artrosis de rodilla: efectos beneficiosos del ejercicio sobre distintos aspectos.

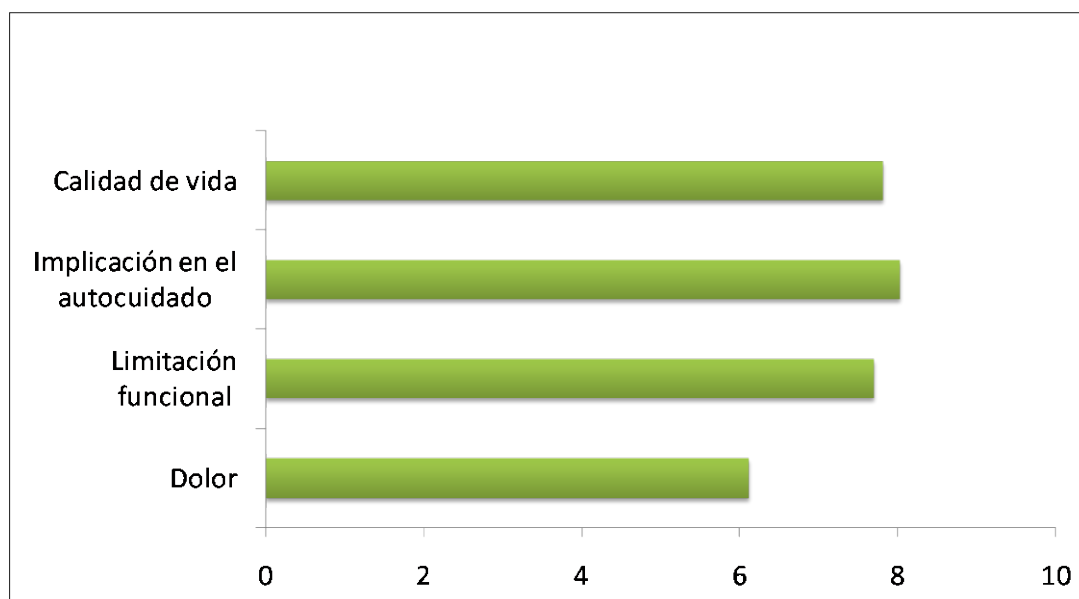

**Figura 8.** Fibromialgia: efectos beneficiosos del ejercicio sobre distintos aspectos.

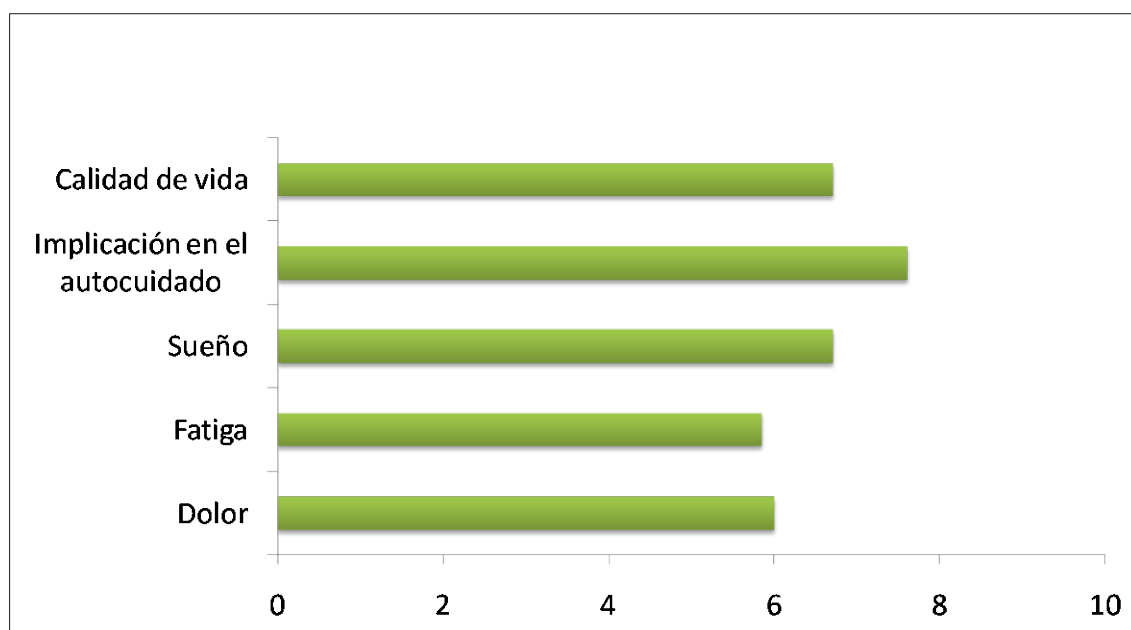

**Figura 9.** Artritis reumatoide: efectos beneficiosos del ejercicio sobre distintos aspectos.

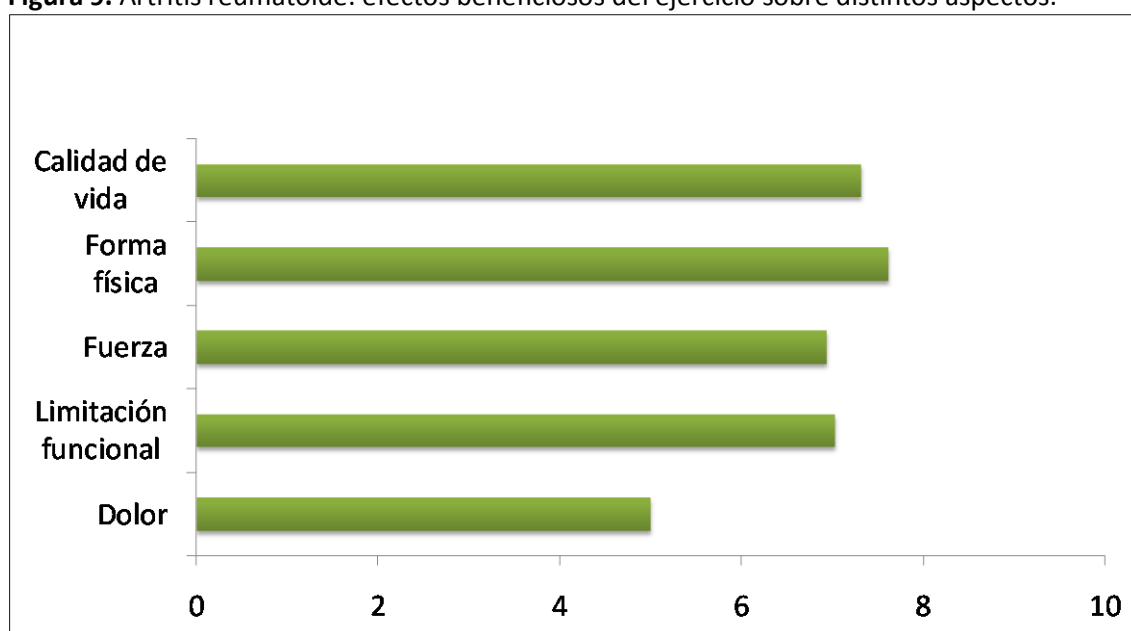

**Figura 10.** Grado de acuerdo (%) con diferentes afirmaciones sobre la prescripción de ejercicio en enfermedades reumáticas.

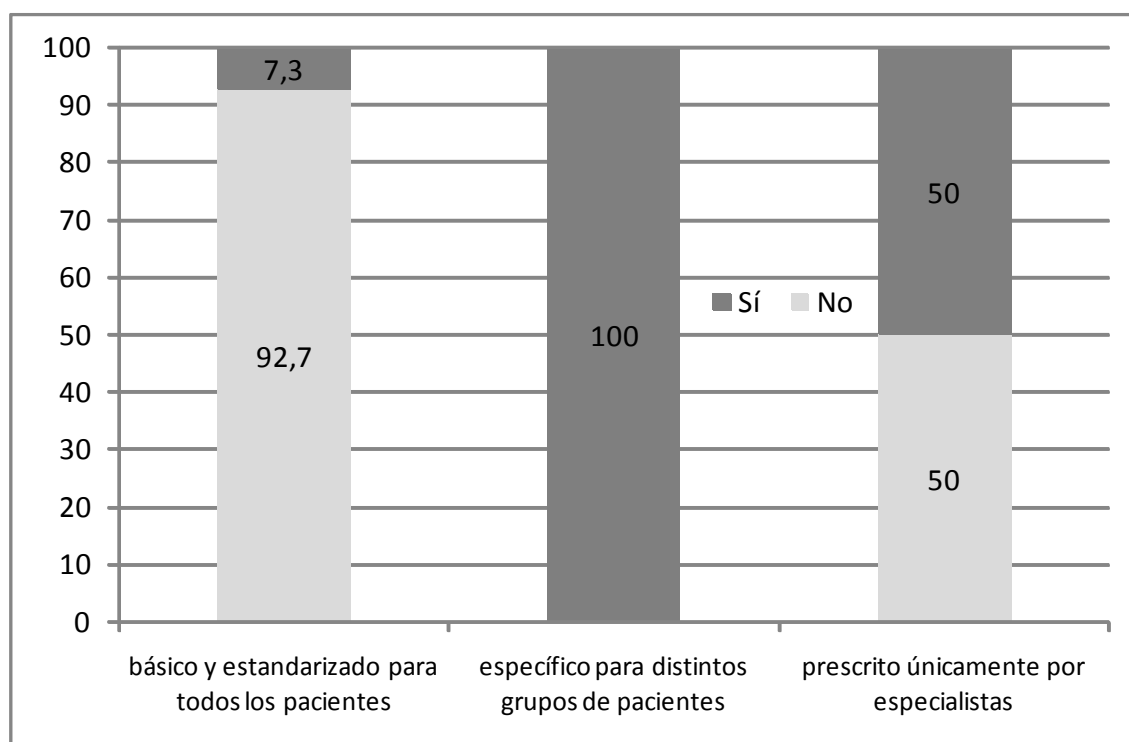

**Figura 11.** Grado de acuerdo sobre la actitud ante un brote inflamatorio de una enfermedad reumática (0=nada de acuerdo; 10=totalmente de acuerdo).

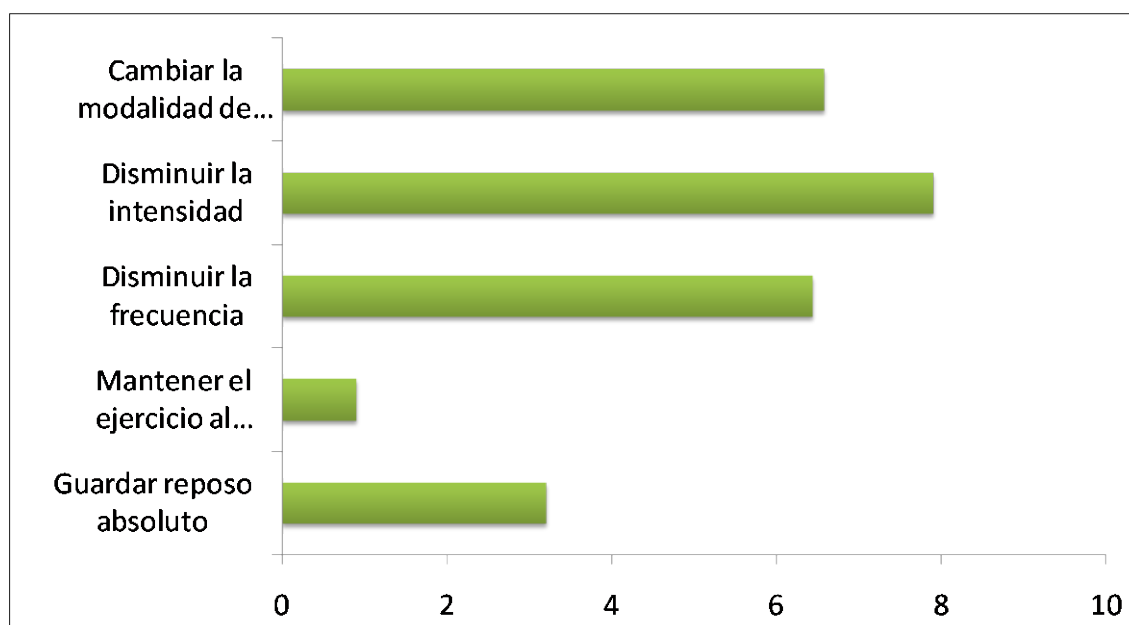

**Figura 12.** Importancia de distintos factores en la adherencia al ejercicio (0-10).

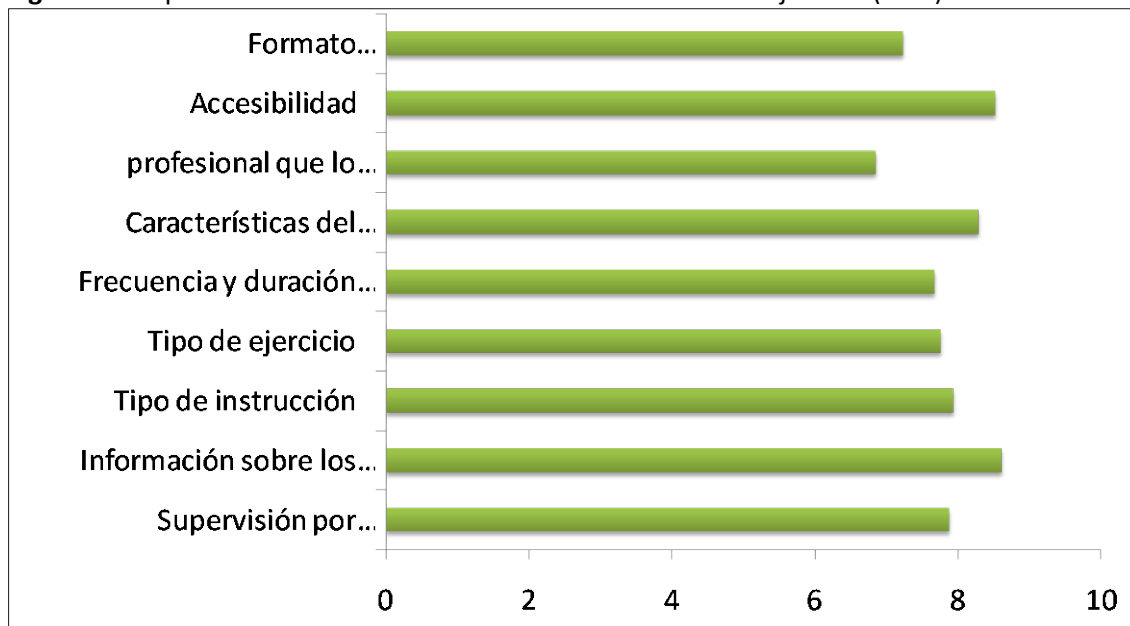

**Figura 13.** Ejercicio como desencadenante de brotes en espondiloartritis.

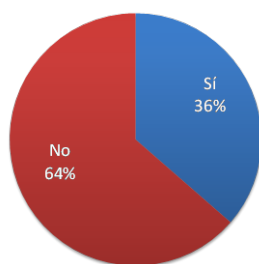

**Figura 14.** Fase en la que debe utilizarse el ejercicio.

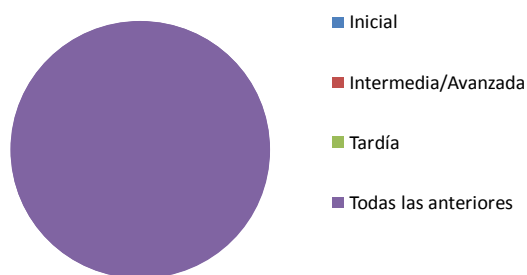

**Figura 15.** El ejercicio puede retrasar el inicio de un tratamiento.

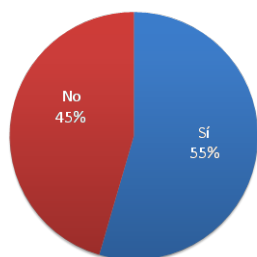

**Figura 16.** Efectos beneficiosos del ejercicio sobre las siguientes características (0-10).

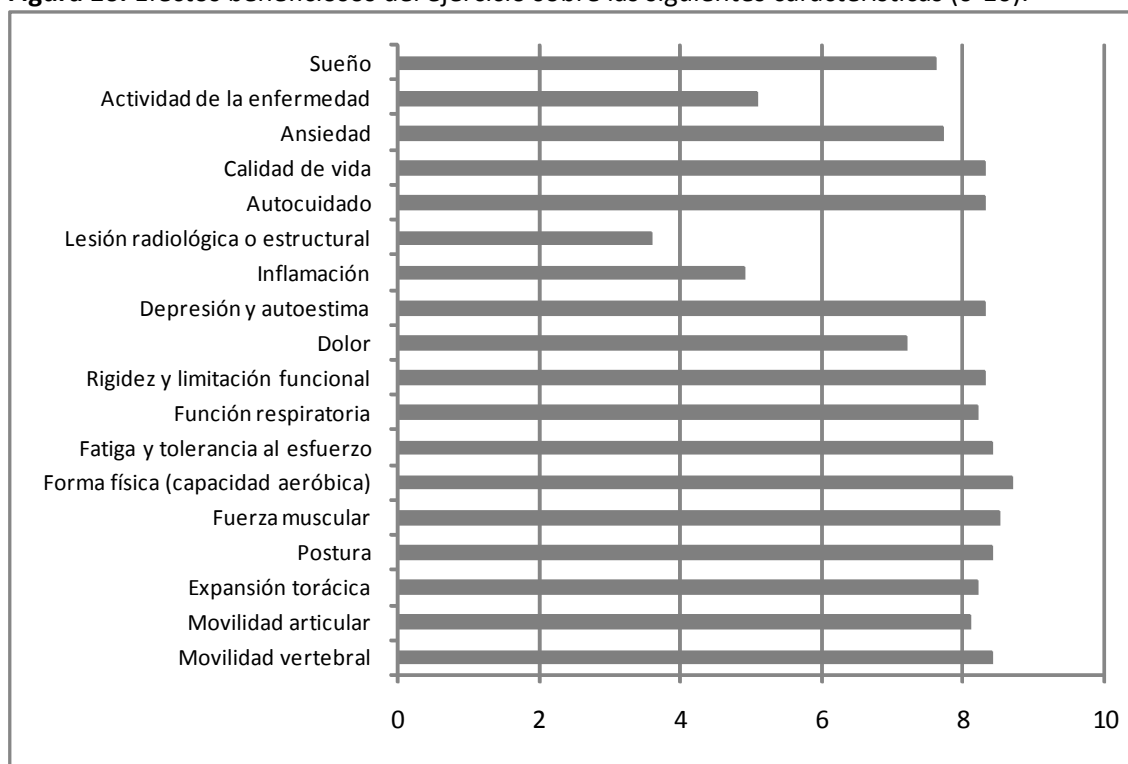

**Figura 17.** Efectos beneficiosos del ejercicio sobre las siguientes características de las espondiloartritis (0-10).

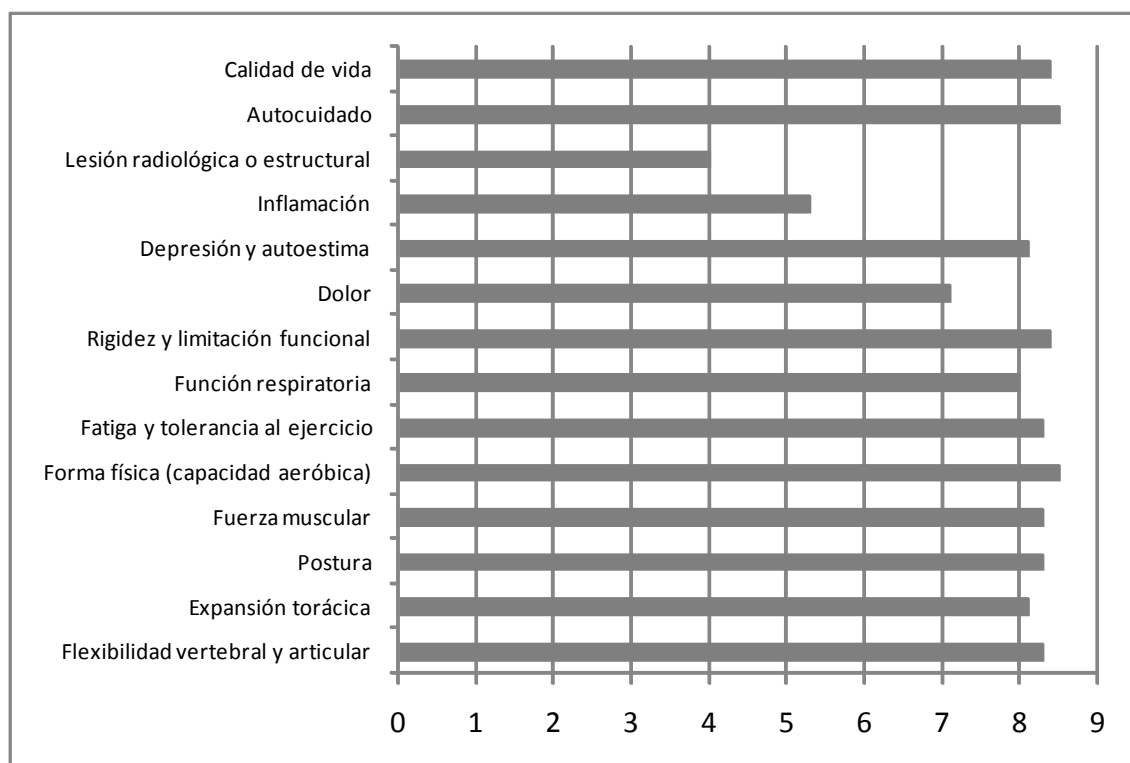

**Figura 18.** Indicación de diferente tratamientos según la fase de la enfermedad (inicial, intermedia o avanzada) desde 0=contraindicado a 10=indicación fundamental.

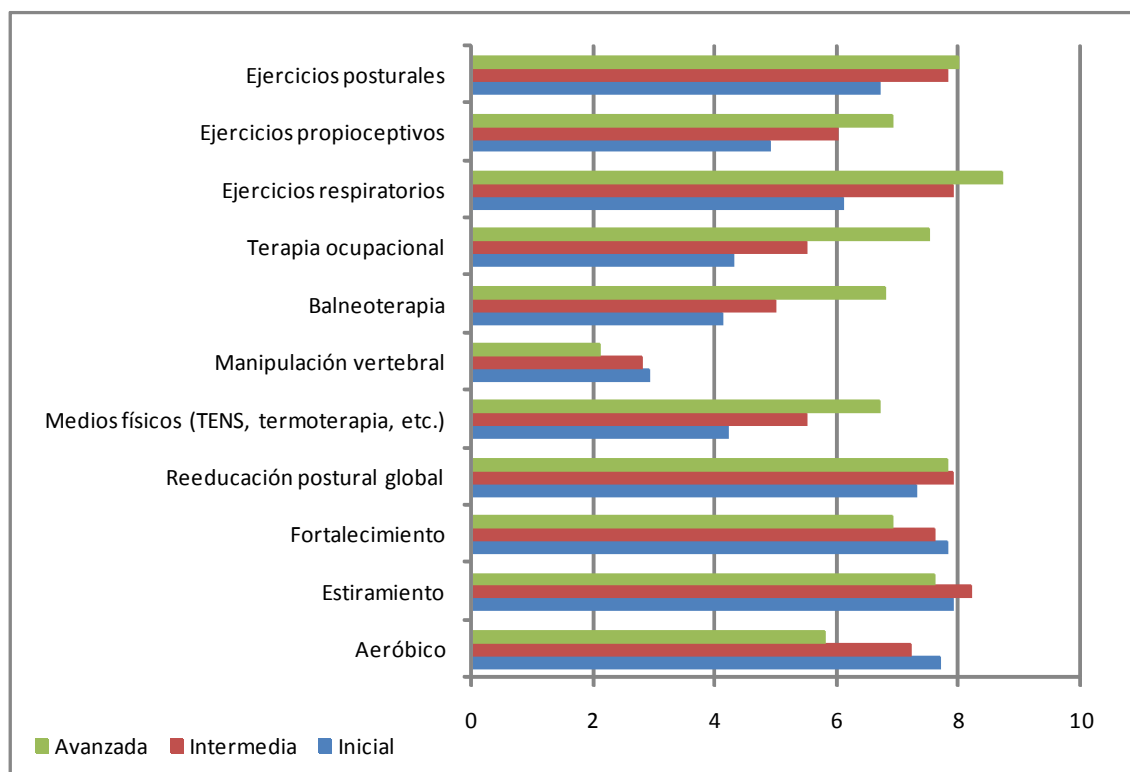

Supplement: mmc2 [file S2173574315001288:mmc2.pdf]
